# Supplementary material
Source: MDPI journal article supplement (https://www.mdpi.com/2304-6740/6/4/127)
Supplement: s1 [file s1]

# Supplementary Materials: Synthesis, reactivity studies and cytotoxicity of two iodidoplatinum(II) complexes. Does photoactivation work?

Leticia Cubo, Thalia Parro, Amancio Carnero, Luca Salassa, Ana I. Matesanz, Adoracion G. Quiroga

## Supporting Information

|                                                                                                                                                                                                                                                                                                                                                                                                                                                                                                                                                                                                                                |    |
|--------------------------------------------------------------------------------------------------------------------------------------------------------------------------------------------------------------------------------------------------------------------------------------------------------------------------------------------------------------------------------------------------------------------------------------------------------------------------------------------------------------------------------------------------------------------------------------------------------------------------------|----|
| <b>Table S1.</b> Crystal Data for complex <b>1</b> and <b>2</b> .....                                                                                                                                                                                                                                                                                                                                                                                                                                                                                                                                                          | 2  |
| <b>Figure S1.</b> Progress of the reaction between complex <b>1</b> and 5'-GMP at 37 °C monitored by <sup>1</sup> H NMR (acetone-d <sub>6</sub> and D <sub>2</sub> O in a ratio 2:1) showing changes in the aromatic area and showing above the <sup>1</sup> H NMR (acetone-d <sub>6</sub> and D <sub>2</sub> O in a ratio 2:1) of non coordinated 5'-GMP and pyridine. Labels: H8-GMP(free) and GMP(free), free nucleotide; H8-GMP* and GMPpy*, nucleotide adduct; 1-py, pyridine ligand complex <b>1</b> ; py*, pyridine signal adducts; S, speciation. The numbers at the base of the signals stand for the integrals ..... | 3  |
| <b>Figure S2.</b> Progress of the reaction between complex <b>2</b> and 5'-GMP at 37 °C monitored by <sup>1</sup> H NMR showing changes in the aromatic area. Labels: free H8, free nucleotide; adduct H8, nucleotide adduct; <b>py</b> , pyridine ligand complex <b>1</b> ; py*, pyridine signal adducts. ....                                                                                                                                                                                                                                                                                                                | 4  |
| <b>Table S2a.</b> Selected bond distances (Å) for complexes <b>1</b> and <b>2</b> optimized with the DFT method at the PBE1PBE:LANL08/6-31G** level using the PCM solvent (water) model. ....                                                                                                                                                                                                                                                                                                                                                                                                                                  | 4  |
| <b>Table S2b.</b> Selected bond distances (Å) for complex <b>2</b> optimized with the DFT method at the PBE1PBE:ECP/6-31G** level using different ECPs for the Pt atom and the PCM solvent (water) model. .                                                                                                                                                                                                                                                                                                                                                                                                                    | 4  |
| <b>Table S2c.</b> Selected bond distances (Å) for complex <b>2</b> optimized with the DFT method at the PBE1PBE:LANL08/BS level using different basis sets (BS) for the non-Pt atoms and the PCM solvent (water) model.....                                                                                                                                                                                                                                                                                                                                                                                                    | 5  |
| <b>Table S2d.</b> Selected bond distances (Å) for complex <b>2</b> optimized with the DFT method using different functionals, the LANL08/6-31G** ECP/basis set and the PCM solvent (water) model. ....                                                                                                                                                                                                                                                                                                                                                                                                                         | 5  |
| <b>Table S3.</b> Experimental and theoretical absorption spectra for complexes <b>1</b> and <b>2</b> in water at the CAM-B3LYP/LANL08/6-31G** level. ....                                                                                                                                                                                                                                                                                                                                                                                                                                                                      | 5  |
| <b>Table S4.</b> Selected TDDFT singlet-singlet transitions and corresponding electron difference density maps (EDDMs) for complexes <b>1</b> and <b>2</b> in water at the CAM-B3LYP/LANL08/6-31G** level. ....                                                                                                                                                                                                                                                                                                                                                                                                                | 6  |
| <b>Table S5.</b> Experimental and theoretical absorption spectra for mono and bis 9-EtG adducts (complexes <b>3</b> to <b>6</b> ) of complexes <b>1</b> and <b>2</b> in water at the CAM-B3LYP/LANL08/6-31G** level.....                                                                                                                                                                                                                                                                                                                                                                                                       | 7  |
| <b>Table S6.</b> Selected TDDFT singlet-singlet transitions and corresponding electron difference density maps (EDDMs) for mono and bis 9-EtG adducts of complexes <b>1</b> and <b>2</b> in water at the CAM-B3LYP/LANL08/6-31G** level. In the EDMs gray indicates a decrease in electron density, while blue-gray indicates an increase. ....                                                                                                                                                                                                                                                                                | 8  |
| <b>Table S7.</b> Selected frontier molecular orbitals for complexes <b>3</b> to <b>6</b> (9-EtG adducts).....                                                                                                                                                                                                                                                                                                                                                                                                                                                                                                                  | 11 |
| <b>Table S8.</b> Selected bond distances (Å) for the mono and bis 9-EtG adducts of complexes <b>1</b> and <b>2</b> optimized with the DFT method at the PBE1PBE:LANL08/6-31G** level using the PCM solvent (water) model. ....                                                                                                                                                                                                                                                                                                                                                                                                 | 12 |

**Table S1.** Crystal Data for complex 1 and 2

|                                     | <b>complex 1</b>                                                                             |                                                                          | <b>complex 2</b>                                                                             |                                                                  |
|-------------------------------------|----------------------------------------------------------------------------------------------|--------------------------------------------------------------------------|----------------------------------------------------------------------------------------------|------------------------------------------------------------------|
| Chemical formula                    | C <sub>8</sub> H <sub>14</sub> I <sub>2</sub> N <sub>2</sub> Pt                              |                                                                          | C <sub>6</sub> H <sub>10</sub> I <sub>2</sub> N <sub>2</sub> Pt                              |                                                                  |
| Formula weight                      | 587.10 g/mol                                                                                 |                                                                          | 559.05 g/mol                                                                                 |                                                                  |
| Temperature                         | 296 K                                                                                        |                                                                          | 296 K                                                                                        |                                                                  |
| Wavelength                          | 0.71073 Å                                                                                    |                                                                          | 0.71073 Å                                                                                    |                                                                  |
| Crystal size                        | 0.15 x 0.20 x 0.30 mm                                                                        |                                                                          | 0.28 x 0.32 x 0.37 mm                                                                        |                                                                  |
| Crystal habit                       | pyramidal                                                                                    |                                                                          | prismatic                                                                                    |                                                                  |
| Crystal system                      | monoclinic                                                                                   |                                                                          | orthorhombic                                                                                 |                                                                  |
| Space group                         | C 1 2/c 1                                                                                    |                                                                          | P 21 21 21                                                                                   |                                                                  |
| Unit cell dimensions                | a = 15.8255(5) Å<br>b = 9.2481(3) Å<br>c = 19.9604(8) Å                                      | $\alpha = 90^\circ$<br>$\beta = 110.013(1)^\circ$<br>$\gamma = 90^\circ$ | a = 9.5004(4) Å<br>b = 9.8547(3) Å<br>c = 12.2052(5) Å                                       | $\alpha = 90^\circ$<br>$\beta = 90^\circ$<br>$\gamma = 90^\circ$ |
| Volume                              | 2744.36(15) Å <sup>3</sup>                                                                   |                                                                          | 1142.85(6) Å <sup>3</sup>                                                                    |                                                                  |
| Z                                   | 8                                                                                            |                                                                          | 4                                                                                            |                                                                  |
| Density (calculated)                | 2.842 g/cm <sup>3</sup>                                                                      |                                                                          | 3.249 g/cm <sup>3</sup>                                                                      |                                                                  |
| Absorption coefficient              | 14.692 mm <sup>-1</sup>                                                                      |                                                                          | 17.631 mm <sup>-1</sup>                                                                      |                                                                  |
| Theta range for data collection     | 2.59 to 25.35°                                                                               |                                                                          | 2.72 to 25.33°                                                                               |                                                                  |
| Index ranges                        | -18 ≤ h ≤ 18, -11 ≤ k ≤ 11, -23 ≤ l ≤ 24                                                     |                                                                          | -10 ≤ h ≤ 11, -10 ≤ k ≤ 11, -14 ≤ l ≤ 14                                                     |                                                                  |
| Reflections collected               | 24220                                                                                        |                                                                          | 7667                                                                                         |                                                                  |
| Independent reflections             | 2499 [R(int) = 0.0421]                                                                       |                                                                          | 2084 [R(int) = 0.0307]                                                                       |                                                                  |
| Coverage of independent reflections | 99.8%                                                                                        |                                                                          | 99.5%                                                                                        |                                                                  |
| Data / restraints / parameters      | 2499 / 0 / 120                                                                               |                                                                          | 2084 / 0 / 101                                                                               |                                                                  |
| Goodness-of-fit on F <sup>2</sup>   | 1.198                                                                                        |                                                                          | 1.325                                                                                        |                                                                  |
| Final R indices                     | <i>I</i> > 2σ( <i>I</i> ): R1 = 0.0377, wR2 = 0.1151<br>all data : R1 = 0.0439, wR2 = 0.1191 |                                                                          | <i>I</i> > 2σ( <i>I</i> ): R1 = 0.0314, wR2 = 0.0873<br>all data : R1 = 0.0405, wR2 = 0.1264 |                                                                  |
| Largest diff. peak and hole         | 1.258 and -1.420 e Å <sup>-3</sup>                                                           |                                                                          | 1.737 and -4.975 e Å <sup>-3</sup>                                                           |                                                                  |

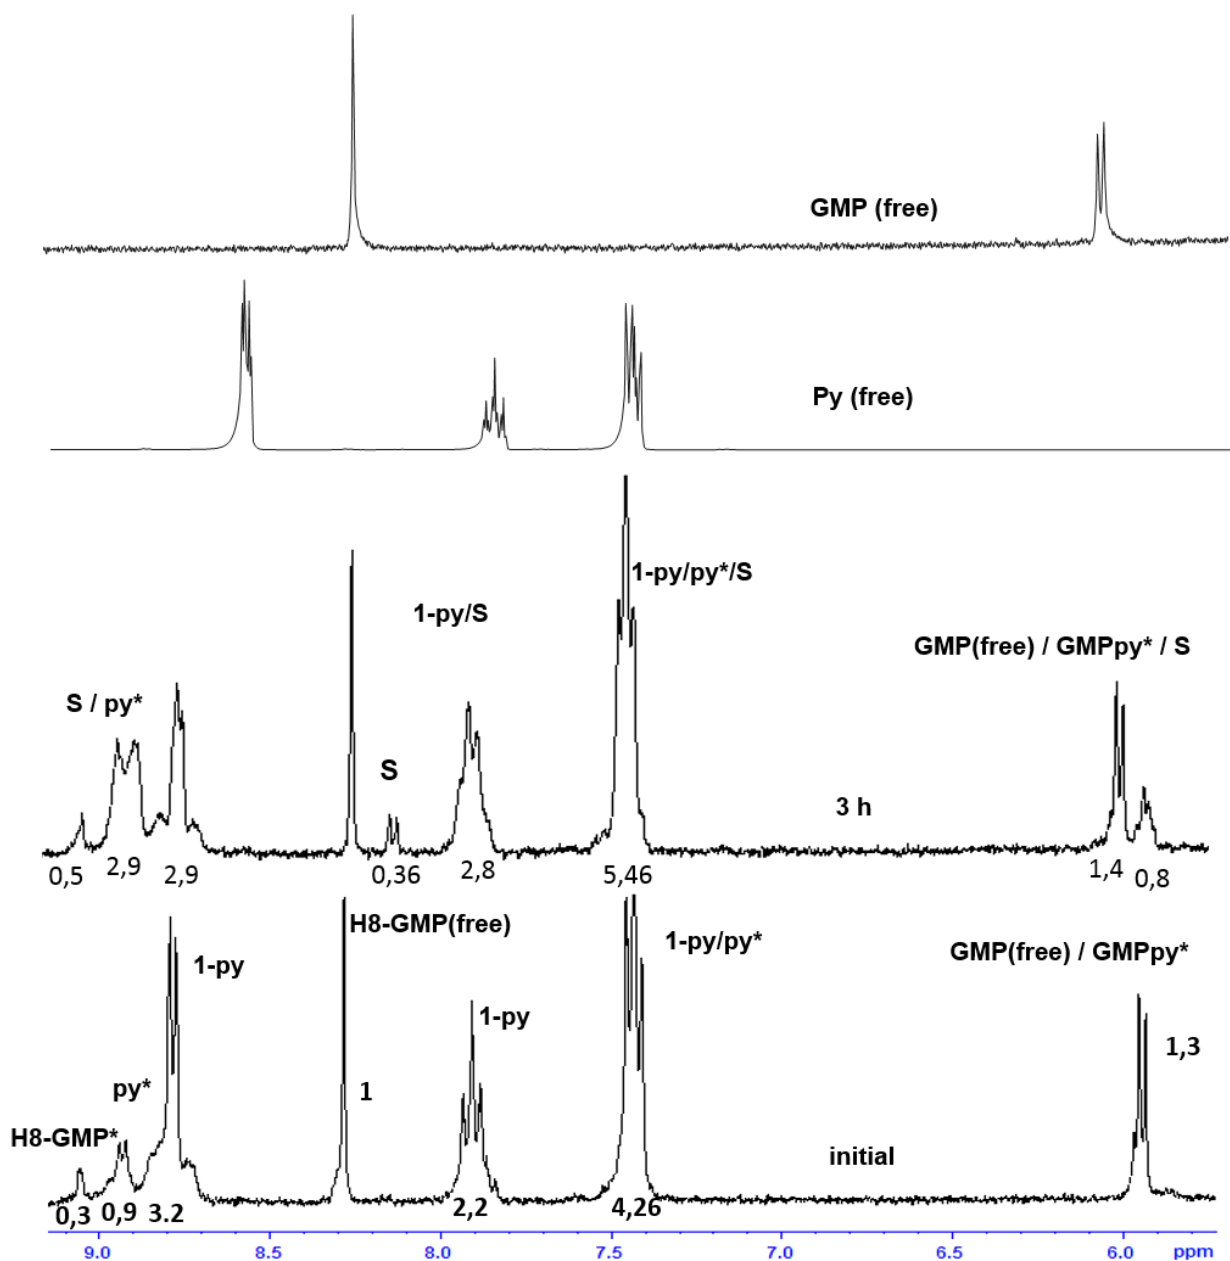

**Figure S1.** Progress of the reaction between complex 1 and 5'-GMP at 37 °C monitored by <sup>1</sup>H NMR (acetone-d<sub>6</sub> and D<sub>2</sub>O in a ratio 2:1) showing changes in the aromatic area and showing above the <sup>1</sup>H NMR (acetone-d<sub>6</sub> and D<sub>2</sub>O in a ratio 2:1) of non coordinated 5'-GMP and pyridine. Labels: H8-GMP(free) and GMP(free), free nucleotide; H8-GMP\* and GMPpy\*, nucleotide adduct; 1-py, pyridine ligand complex 1; py\*, pyridine signal adducts; S, speciation. The numbers at the base of the signals stand for the integrals

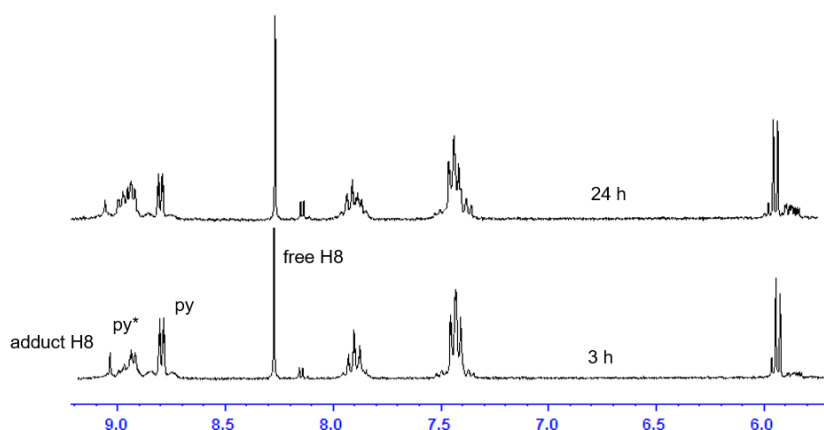

**Figure S2.** Progress of the reaction between complex **2** and 5'-GMP at 37 °C monitored by  $^1\text{H}$  NMR showing changes in the aromatic area. Labels: free H8, free nucleotide; adduct H8, nucleotide adduct; py, pyridine ligand complex **1**; py\*, pyridine signal adducts.

**Table S2a.** Selected bond distances ( $\text{\AA}$ ) for complexes **1** and **2** optimized with the DFT method at the PBE1PBE:LANL08/6-31G\*\* level using the PCM solvent (water) model.

|           |       | Pt-I  | Pt-N  | Pt-N(py) |
|-----------|-------|-------|-------|----------|
| 1         | 2.687 | 2.687 | 2.065 | 2.030    |
| 1 – X-ray | 2.596 | 2.592 | 2.067 | 2.025    |
| 2         | 2.689 | 2.686 | 2.068 | 2.032    |
| 2 – X-ray | 2.597 | 2.591 | 2.070 | 2.022    |

X-ray structural parameters are reported for comparison when available.

**Table S2b.** Selected bond distances ( $\text{\AA}$ ) for complex **2** optimized with the DFT method at the PBE1PBE:ECP/6-31G\*\* level using different ECPs for the Pt atom and the PCM solvent (water) model.

|           |       | 6-31G** PCM (water) |          |        |          |       |          |
|-----------|-------|---------------------|----------|--------|----------|-------|----------|
| Complex 2 | X-ray | LANL2DZ             | $\Delta$ | LANL08 | $\Delta$ | SDD   | $\Delta$ |
| Pt-I(2)   | 2.596 | 2.706               | 0.110    | 2.687  | 0.091    | 2.692 | 0.096    |
| Pt-I(3)   | 2.592 | 2.706               | 0.114    | 2.687  | 0.095    | 2.692 | 0.100    |
| Pt-N(8)   | 2.067 | 2.068               | 0.001    | 2.065  | -0.002   | 2.070 | 0.003    |
| Pt-N(20)  | 2.025 | 2.032               | 0.007    | 2.030  | 0.005    | 2.037 | 0.012    |

**Table S2c.** Selected bond distances (Å) for complex **2** optimized with the DFT method at the PBE1PBE:LANL08/BS level using different basis sets (BS) for the non-Pt atoms and the PCM solvent (water) model.

| LANL08 PCM (water) |       |         |          |          |          |           |          |
|--------------------|-------|---------|----------|----------|----------|-----------|----------|
| Complex <b>2</b>   | X-ray | 6-31G** | $\Delta$ | 6-31+G** | $\Delta$ | 6-311G**  | $\Delta$ |
| Pt–I(2)            | 2.596 | 2.687   | 0.091    | 2.683    | 0.087    | 2.682     | 0.086    |
| Pt–I(3)            | 2.592 | 2.687   | 0.095    | 2.683    | 0.091    | 2.682     | 0.090    |
| Pt–N(8)            | 2.067 | 2.065   | -0.002   | 2.064    | -0.003   | 2.065     | -0.002   |
| Pt–N(20)           | 2.025 | 2.030   | 0.005    | 2.030    | 0.005    | 2.032     | 0.007    |
|                    |       |         |          |          |          | 6-311+G** | $\Delta$ |
|                    |       |         |          |          |          | 2.685     | 0.089    |
|                    |       |         |          |          |          | 2.685     | 0.093    |
|                    |       |         |          |          |          | 2.064     | -0.003   |
|                    |       |         |          |          |          | 2.032     | 0.007    |

**Table S2d.** Selected bond distances (Å) for complex **2** optimized with the DFT method using different functionals, the LANL08/6-31G\*\* ECP/basis set and the PCM solvent (water) model.

| LANL08/6-31G** PCM (water) |       |         |          |           |          |       |          |
|----------------------------|-------|---------|----------|-----------|----------|-------|----------|
| Complex <b>2</b>           | X-ray | PBE1PBE | $\Delta$ | LC-wPBE   | $\Delta$ |       |          |
| Pt–I(2)                    | 2.596 | 2.687   | 0.091    | 2.664     | 0.068    |       |          |
| Pt–I(3)                    | 2.592 | 2.687   | 0.095    | 2.664     | 0.072    |       |          |
| Pt–N(8)                    | 2.067 | 2.065   | -0.002   | 2.059     | -0.008   |       |          |
| Pt–N(20)                   | 2.025 | 2.030   | 0.005    | 2.032     | 0.007    |       |          |
|                            |       | B3LYP   | $\Delta$ | CAM-B3LYP | $\Delta$ | M062X | $\Delta$ |
|                            |       | 2.739   | 0.143    | 2.707     | 0.111    | 2.707 | 0.111    |
|                            |       | 2.739   | 0.147    | 2.707     | 0.115    | 2.707 | 0.115    |
|                            |       | 2.090   | 0.023    | 2.074     | 0.007    | 2.072 | 0.005    |
|                            |       | 2.056   | 0.031    | 2.046     | 0.021    | 2.046 | 0.021    |

**Table S3.** Experimental and theoretical absorption spectra for complexes **1** and **2** in water at the CAM-B3LYP/LANL08/6-31G\*\* level.

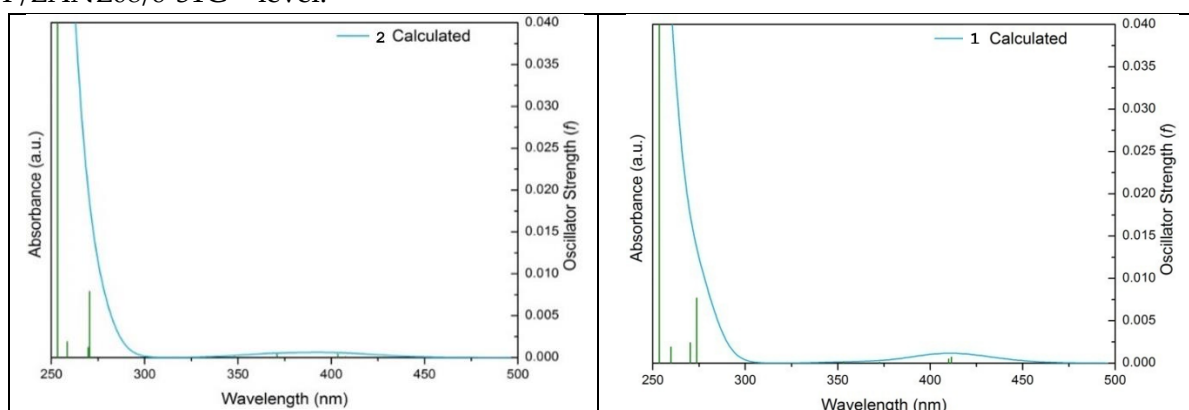

Singlet-singlet transitions are shown as vertical bars with heights equal to their oscillator strengths. The theoretical curves were obtained using GAUSSSUM 2.2.<sup>32</sup>

**Table S4.** Selected TDDFT singlet-singlet transitions and corresponding electron difference density maps (EDDMs) for complexes **1** and **2** in water at the CAM-B3LYP/LANL08/6-31G\*\* level.

| Complex 1 |                        |        |                                   |           |                                                                                       |
|-----------|------------------------|--------|-----------------------------------|-----------|---------------------------------------------------------------------------------------|
| Tr.       | E <sub>calc</sub> (nm) | f      | Composition                       | Character | EDDM                                                                                  |
| 1         | 407.63                 | 0.0001 | HOMO→LUMO (90%)<br>H-9→LUMO (8%)  | d-d/LMCT  | 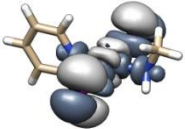   |
| 2         | 403.55                 | 0.0004 | H-2→LUMO (96%)                    | d-d       |    |
| 3         | 370.86                 | 0.0004 | H-8→LUMO (15%)<br>H-1→LUMO (76%)  | d-d/LMCT  |    |
| 4         | 348.11                 | 0.0001 | H-6→LUMO (97%)                    | d-d       |    |
| 5         | 270.49                 | 0.0079 | H-3→LUMO (97%)                    | LMCT      |   |
| 6         | 269.69                 | 0.0012 | H-4→LUMO (89%)<br>HOMO→L+1 (9%)   | LMCT      |  |
| Complex 2 |                        |        |                                   |           |                                                                                       |
| Tr.       | E <sub>calc</sub> (nm) | f      | Composition                       | Character | EDDM                                                                                  |
| 1         | 411.49                 | 0.0007 | H-2→LUMO (27%)<br>HOMO→LUMO (64%) | d-d/LMCT  |  |
| 2         | 410.08                 | 0.0005 | H-2→LUMO (65%)<br>HOMO→LUMO (27%) | d-d/LMCT  |  |
| 3         | 372.56                 | 0.0001 | H-8→LUMO (13%)<br>H-1→LUMO (73%)  | d-d/LMCT  |  |
| 4         | 353.07                 | 0.0001 | H-6→LUMO (88%)                    | d-d/LMCT  |  |
| 5         | 273.74                 | 0.0077 | H-3→LUMO (92%)                    | LMCT      |  |
| 6         | 270.27                 | 0.0024 | H-4→LUMO (83%)                    | d-d/LMCT  |  |

In the EDDMs gray indicates a decrease in electron density, while blue-gray indicates an increase.

**Table S5.** Experimental and theoretical absorption spectra for mono and bis 9-EtG adducts (complexes 3 to 6) of complexes 1 and 2 in water at the CAM-B3LYP/LANL08/6-31G\*\* level

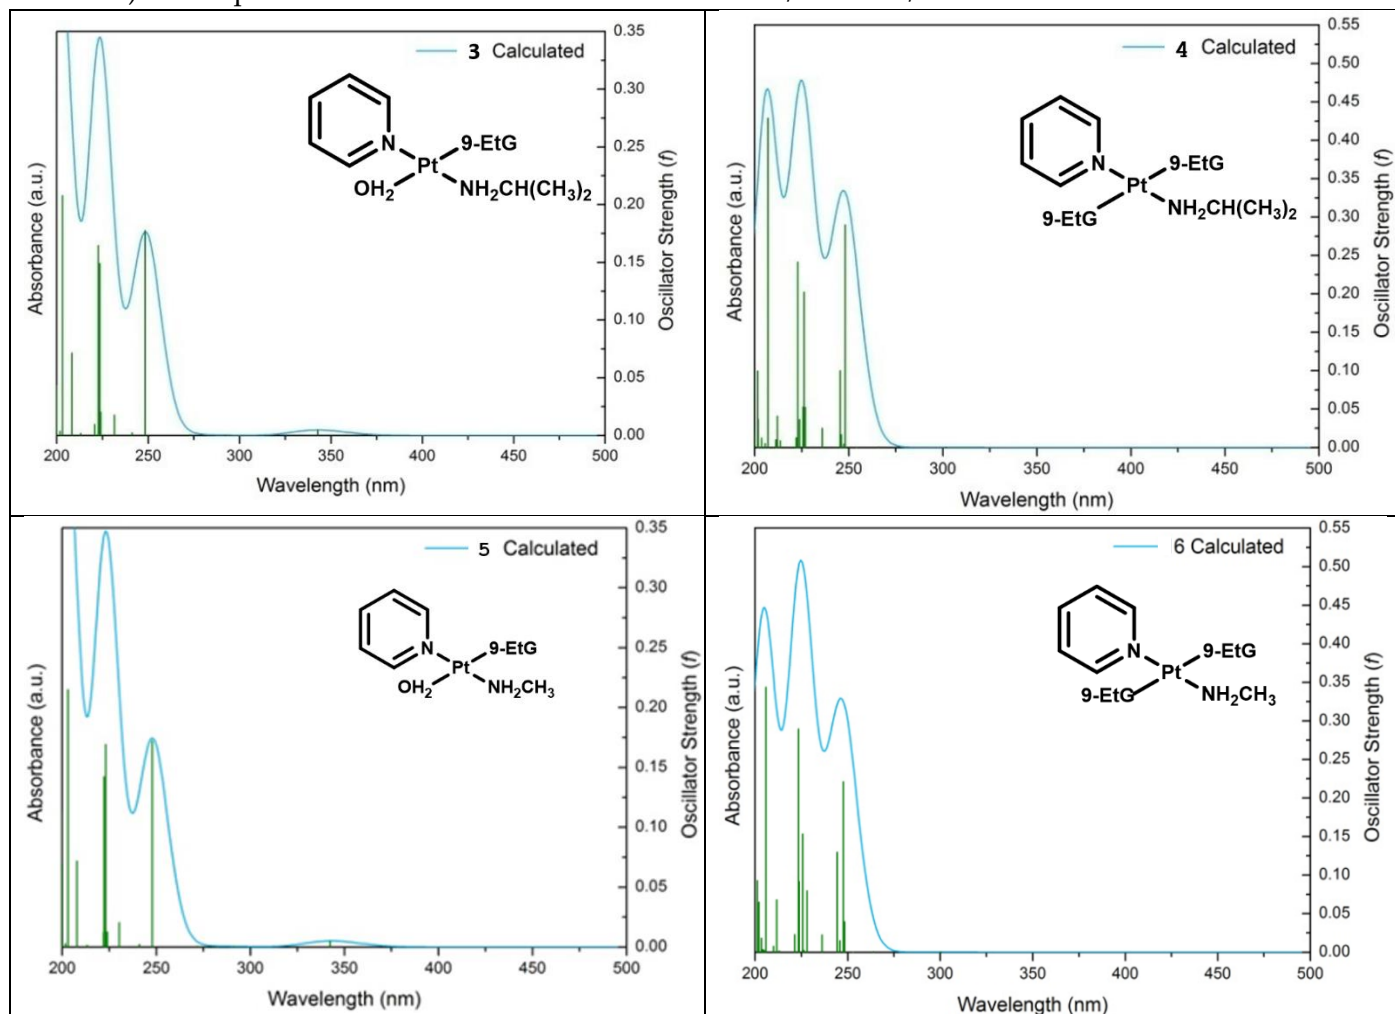

Singlet-singlet transitions are shown as vertical bars with heights equal to their oscillator strengths. The theoretical curves were obtained using GAUSSSUM 2.2.<sup>32</sup>

**Table S6.** Selected TDDFT singlet-singlet transitions and corresponding electron difference density maps (EDDMs) for mono and bis 9-EtG adducts of complexes **1** and **2** in water at the CAM-B3LYP/LANL08/6-31G\*\* level. In the EDDMs gray indicates a decrease in electron density, while blue-gray indicates an increase.

| Complex 3 |                        |        |                                                                |           |                                                                                       |
|-----------|------------------------|--------|----------------------------------------------------------------|-----------|---------------------------------------------------------------------------------------|
| Tr.       | E <sub>calc</sub> (nm) | F      | Composition                                                    | Character | EDDM                                                                                  |
| 1         | 342.85                 | 0.0049 | H-1→L+1 (42%)<br>H-1→L+2 (41%)                                 | MLCT      | 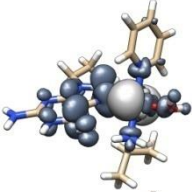   |
| 2         | 292.01                 | 0.0002 | H-2→L+1 (26%)<br>H-2→L+2 (25%)<br>HOMO→L+1 (11%)               | d-d/LC    |    |
| 3         | 282.91                 | 0.0000 | H-3→L+1 (33%)<br>H-3→L+2 (32%)                                 | MLCT      |   |
| 4         | 273.07                 | 0.0007 | H-5→L+1 (25%)<br>H-5→L+2 (24%)<br>H-4→L+1 (8%)<br>H-4→L+2 (8%) | MLCT      |  |
| 5         | 248.41                 | 0.1776 | HOMO→L+1 (45%)<br>HOMO→L+2 (39%)                               | LC        |  |
| 6         | 241.29                 | 0.0022 | H-1→LUMO (91%)<br>HOMO→LUMO (4%)                               | MLCT      |  |
| Complex 4 |                        |        |                                                                |           |                                                                                       |
| Tr.       | E <sub>calc</sub> (nm) | F      | Composition                                                    | Character | EDDM                                                                                  |
| 1         | 301.70                 | 0.0004 | H-2→L+4 (19%)<br>H-2→L+5 (62%)<br>H-2→L+6 (11%)                | MLCT      |  |



|   |        |        |                                                  |        |                                                                                      |
|---|--------|--------|--------------------------------------------------|--------|--------------------------------------------------------------------------------------|
| 2 | 266.07 | 0.0008 | H-3→L+4 (11%)<br>H-3→L+5 (36%)<br>HOMO→L+5 (17%) | d-d/LC | 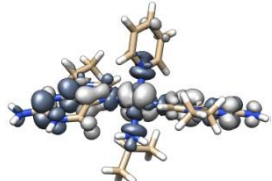  |
| 3 | 254.14 | 0.0005 | H-4→L+4 (17%)<br>H-4→L+5 (55%)<br>H-4→L+6 (10%)  | MLCT   |   |
| 4 | 248.04 | 0.2898 | H-1→L+1 (33%)<br>H-1→L+2 (14%)<br>HOMO→L+1 (29%) | LC     |   |
| 5 | 247.39 | 0.0045 | H-5→L+4 (11%)<br>H-5→L+5 (37%)<br>H-5→L+6 (7%)   | MLCT   |   |
| 6 | 245.99 | 0.0165 | H-2→LUMO (80%)<br>HOMO→L+2 (5%)                  | MLCT   |  |

**Complex 5**

| Tr. | E <sub>calc</sub> (nm) | F      | Composition                                                                       | Character | EDDM                                                                                  |
|-----|------------------------|--------|-----------------------------------------------------------------------------------|-----------|---------------------------------------------------------------------------------------|
| 1   | 342.50                 | 0.0052 | H-1→L+1 (26%)<br>H-1→L+2 (57%)<br>H-1→L+6 (11%)                                   | MLCT      | 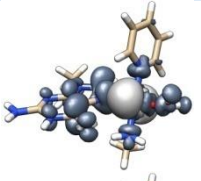 |
| 2   | 290.92                 | 0.0005 | H-2→L+1 (17%)<br>H-2→L+2 (35%)<br>HOMO→L+2 (12%)<br>H-2→L+6 (7%)<br>HOMO→L+1 (7%) | d-d/LC    |  |
| 3   | 281.99                 | 0.0000 | H-3→L+1 (19%)<br>H-3→L+2 (42%)<br>H-3→L+6 (8%)                                    | MLCT      |  |
| 4   | 271.91                 | 0.0007 | H-5→L+1 (15%)<br>H-5→L+2 (33%)<br>H-4→L+2 (9%)<br>H-3→L+2 (8%)                    | MLCT      |  |

|   |        |        |                                                   |      |
|---|--------|--------|---------------------------------------------------|------|
| 5 | 247.78 | 0.1722 | HOMO→L+1 (63%)<br>HOMO→L+2 (20%)<br>HOMO→L+4 (7%) | LMCT |
| 6 | 241.00 | 0.0022 | H-1→LUMO (92%)<br>HOMO→LUMO (3%)                  | MLCT |

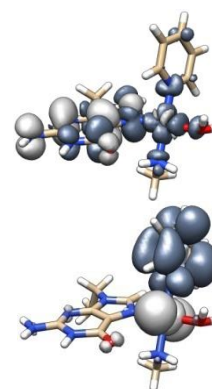**Complex 6**

| Tr. | E <sub>calc</sub> (nm) | F      | Composition                                                       | Character | EDDM |
|-----|------------------------|--------|-------------------------------------------------------------------|-----------|------|
| 1   | 300.39                 | 0.0004 | H-2→L+4 (58%)<br>H-2→L+5 (30%)                                    | MLCT      |      |
| 2   | 263.95                 | 0.0009 | H-3→L+4 (33%)<br>H-3→L+5 (17%)<br>HOMO→L+4 (15%)<br>HOMO→L+5 (7%) | MLCT      |      |
| 3   | 252.90                 | 0.0002 | H-4→L+4 (49%)<br>H-4→L+5 (25%)                                    | MLCT      |      |
| 4   | 248.32                 | 0.0397 | H-5→L+4 (35%)<br>H-5→L+5 (18%)                                    | MLCT      |      |
| 5   | 247.69                 | 0.2211 | H-1→L+1 (43%)<br>HOMO→L+1 (22%)                                   | LC        |      |
| 6   | 245.77                 | 0.0148 | H-2→LUMO (85%)<br>HOMO→L+2 (3%)                                   | MLCT      |      |

**Table S7.** Selected frontier molecular orbitals for complexes **3** to **6** (9-EtG adducts).

|                                                                                                       |                                                                                                        |
|-------------------------------------------------------------------------------------------------------|--------------------------------------------------------------------------------------------------------|
| 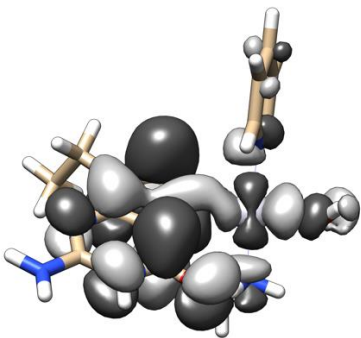 <p>3 – LUMO+1</p>   |  <p>3 – LUMO+2</p>   |
|  <p>4 – LUMO+4</p>   |  <p>4 – LUMO+5</p>   |
|  <p>5 – LUMO+1</p> |  <p>5 – LUMO+2</p> |
|  <p>6 – LUMO+4</p> |  <p>6 – LUMO+5</p> |

**Table S8.** Selected bond distances (Å) for the mono and bis 9-EtG adducts of complexes **1** and **2** optimized with the DFT method at the PBE1PBE:LANL08/6-31G\*\* level using the PCM solvent (water) model.

|          | Pt–O(H <sub>2</sub> O) | Pt–N(9EtG) | Pt–N(ma)  | Pt–N(py) |
|----------|------------------------|------------|-----------|----------|
| <b>5</b> | 2.099                  | 1.993      | 2.053     | 2.045    |
|          | Pt–N(9EtG)             | Pt–N(9EtG) | Pt–N(ma)  | Pt–N(py) |
| <b>6</b> | 2.035                  | 2.024      | 2.060     | 2.045    |
|          | Pt–O(H <sub>2</sub> O) | Pt–N(9EtG) | Pt–N(ipa) | Pt–N(py) |
| <b>3</b> | 2.100                  | 1.993      | 2.053     | 2.046    |
|          | Pt–N(9EtG)             | Pt–N(9EtG) | Pt–N(ipa) | Pt–N(py) |
| <b>4</b> | 2.034                  | 2.028      | 2.062     | 2.043    |

X-ray structural parameters are reported for comparison when available.
